# Supplementary material for: Metabolic classification of bladder cancer based on multi-omics integrated analysis to predict patient prognosis and treatment response
Source: PubMed Central journal article supplement (PMC8117567; doi:10.1186/s12967-021-02865-8), 2021-05-13

rank = 2

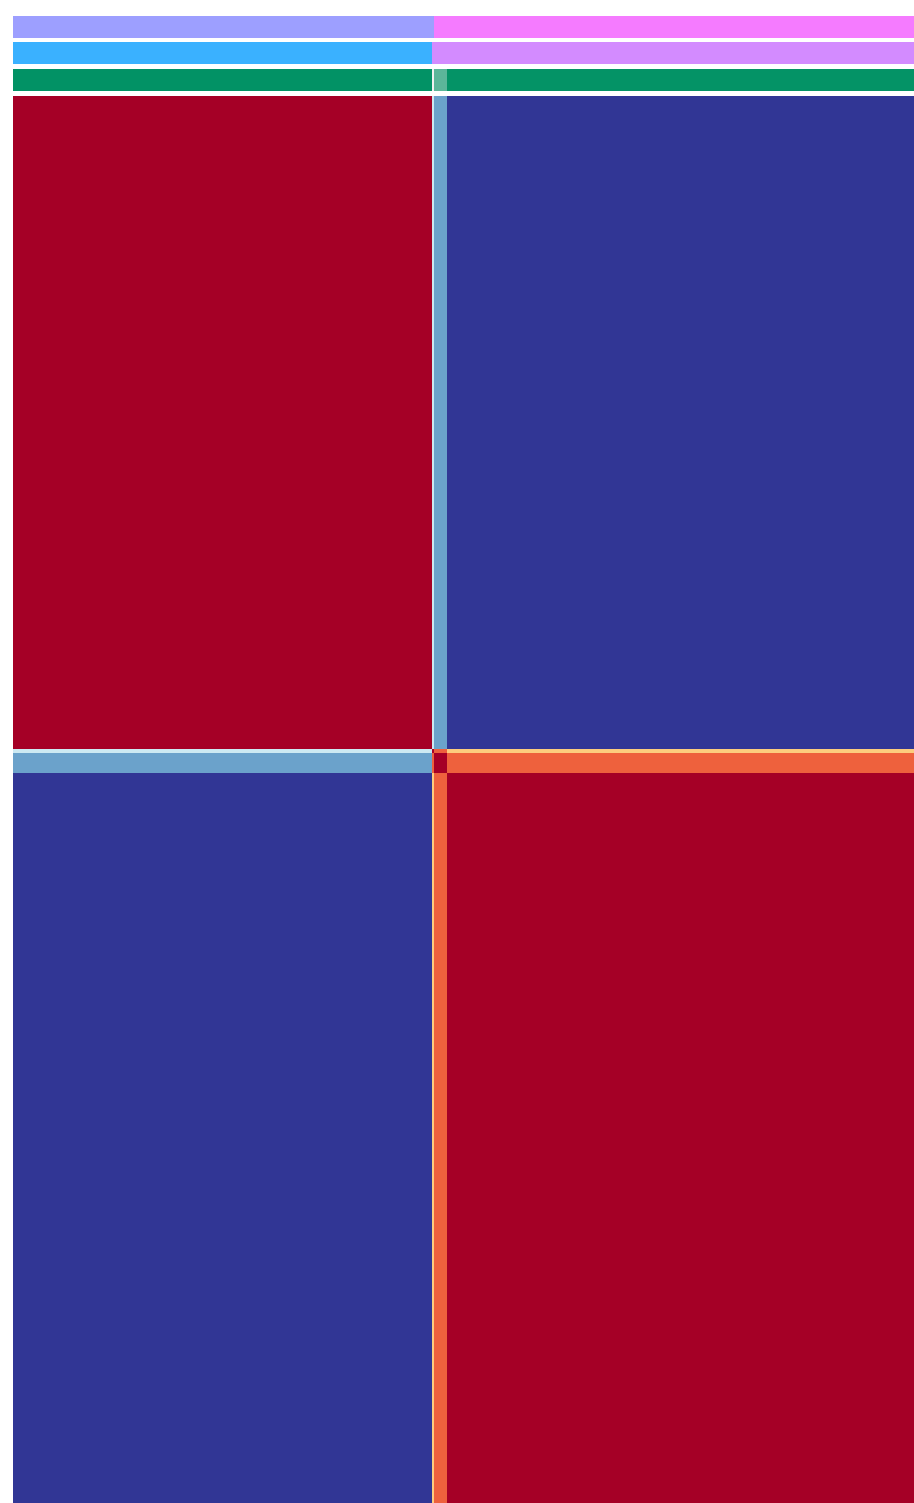

rank = 3

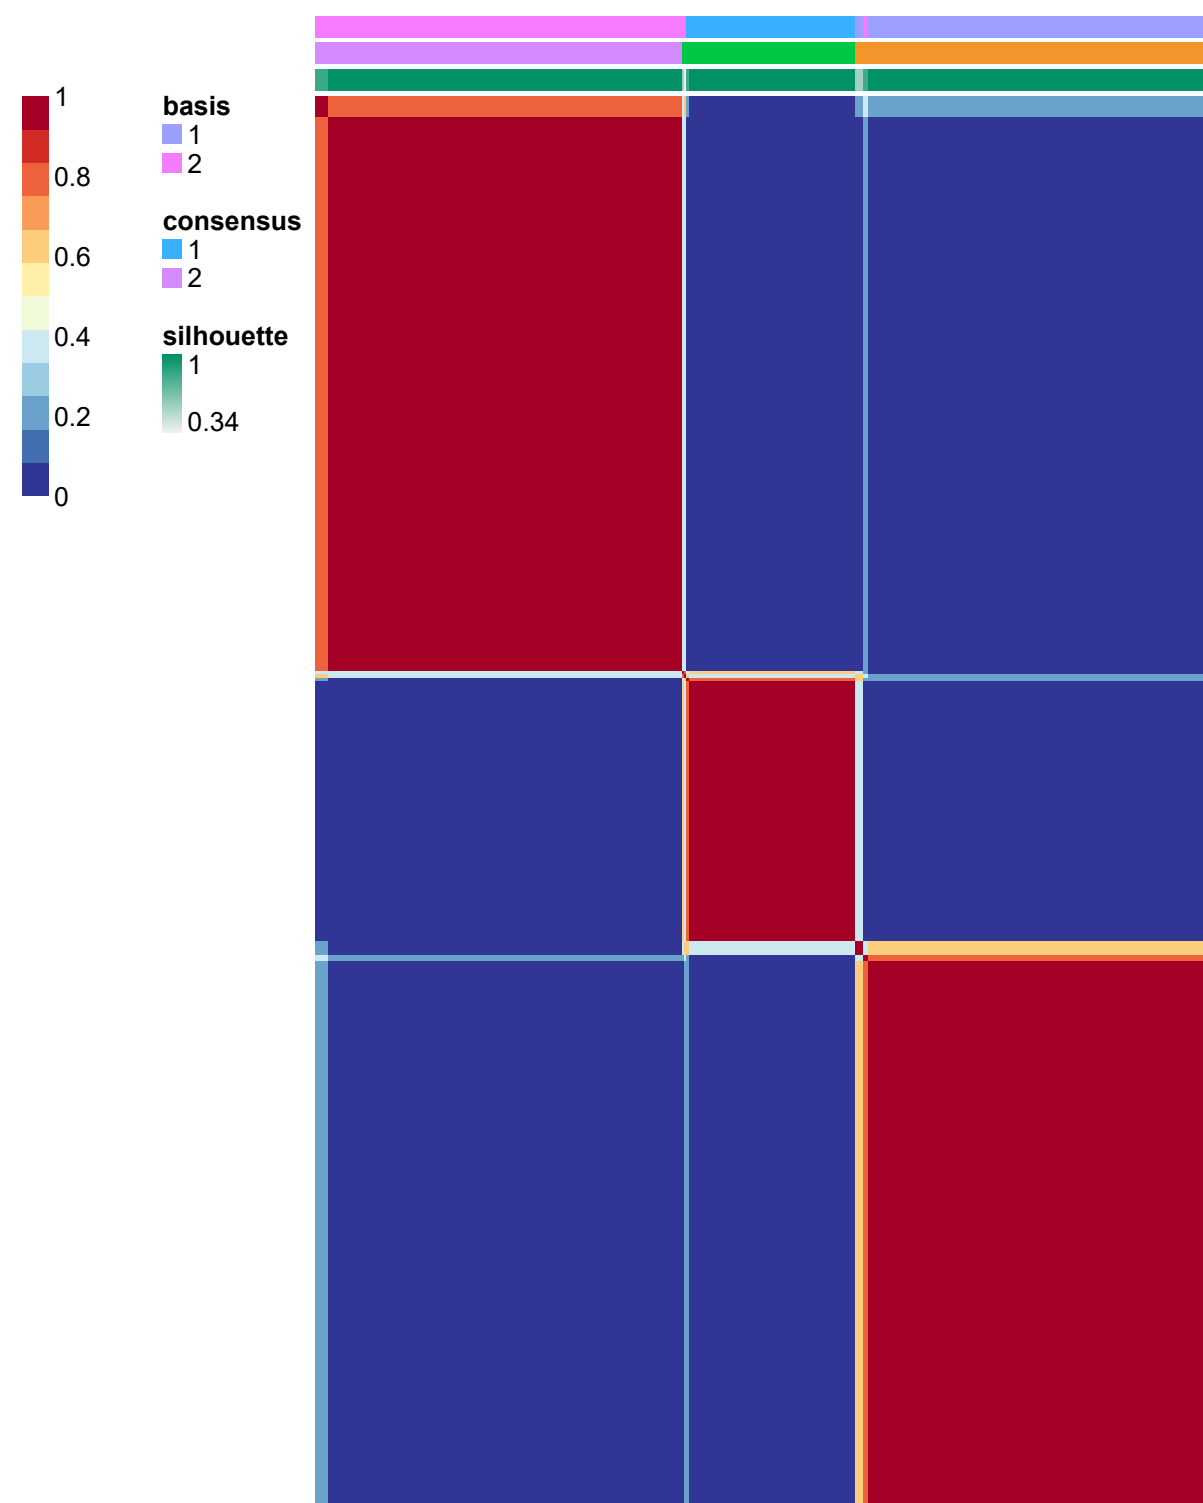

rank = 4

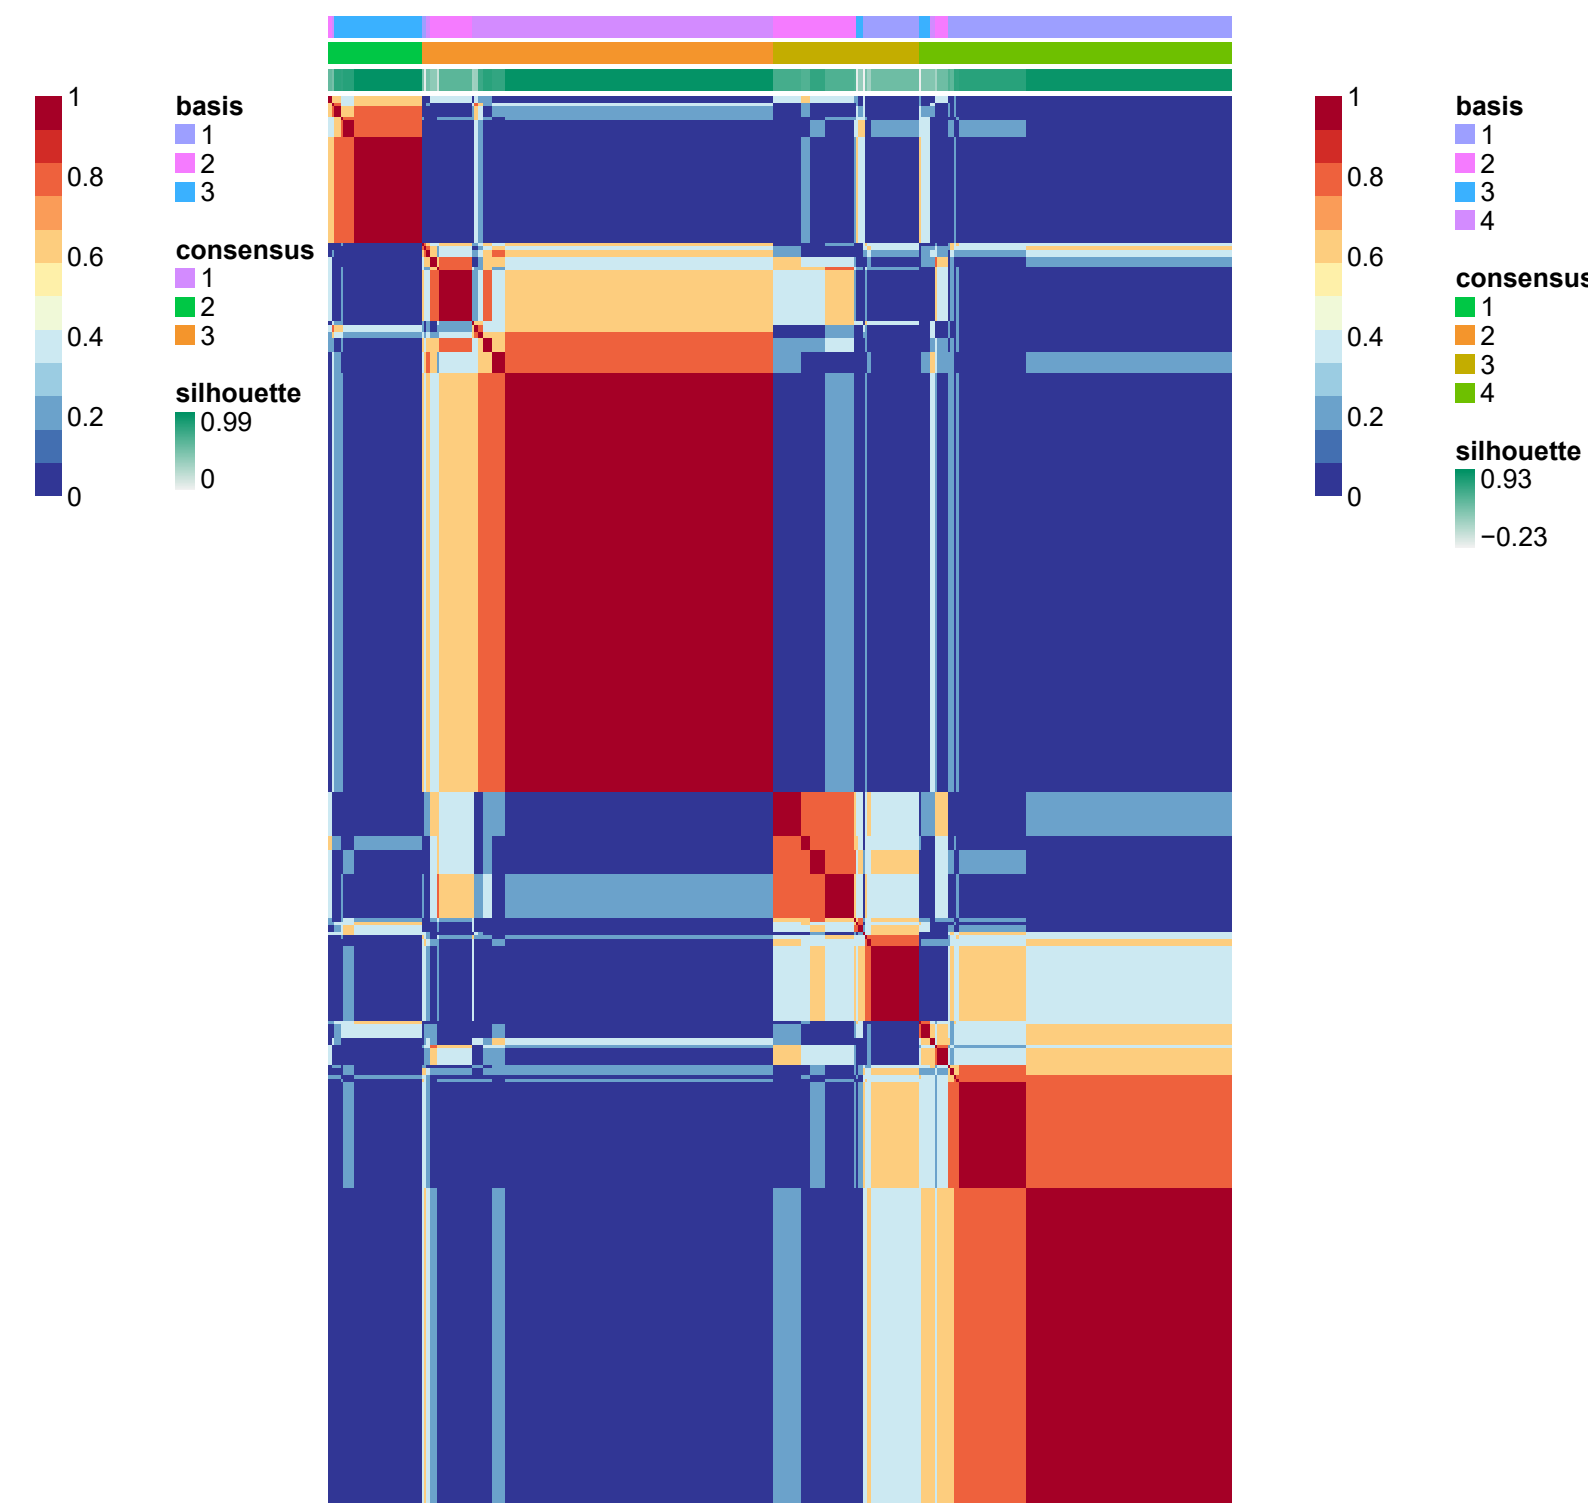

rank = 5

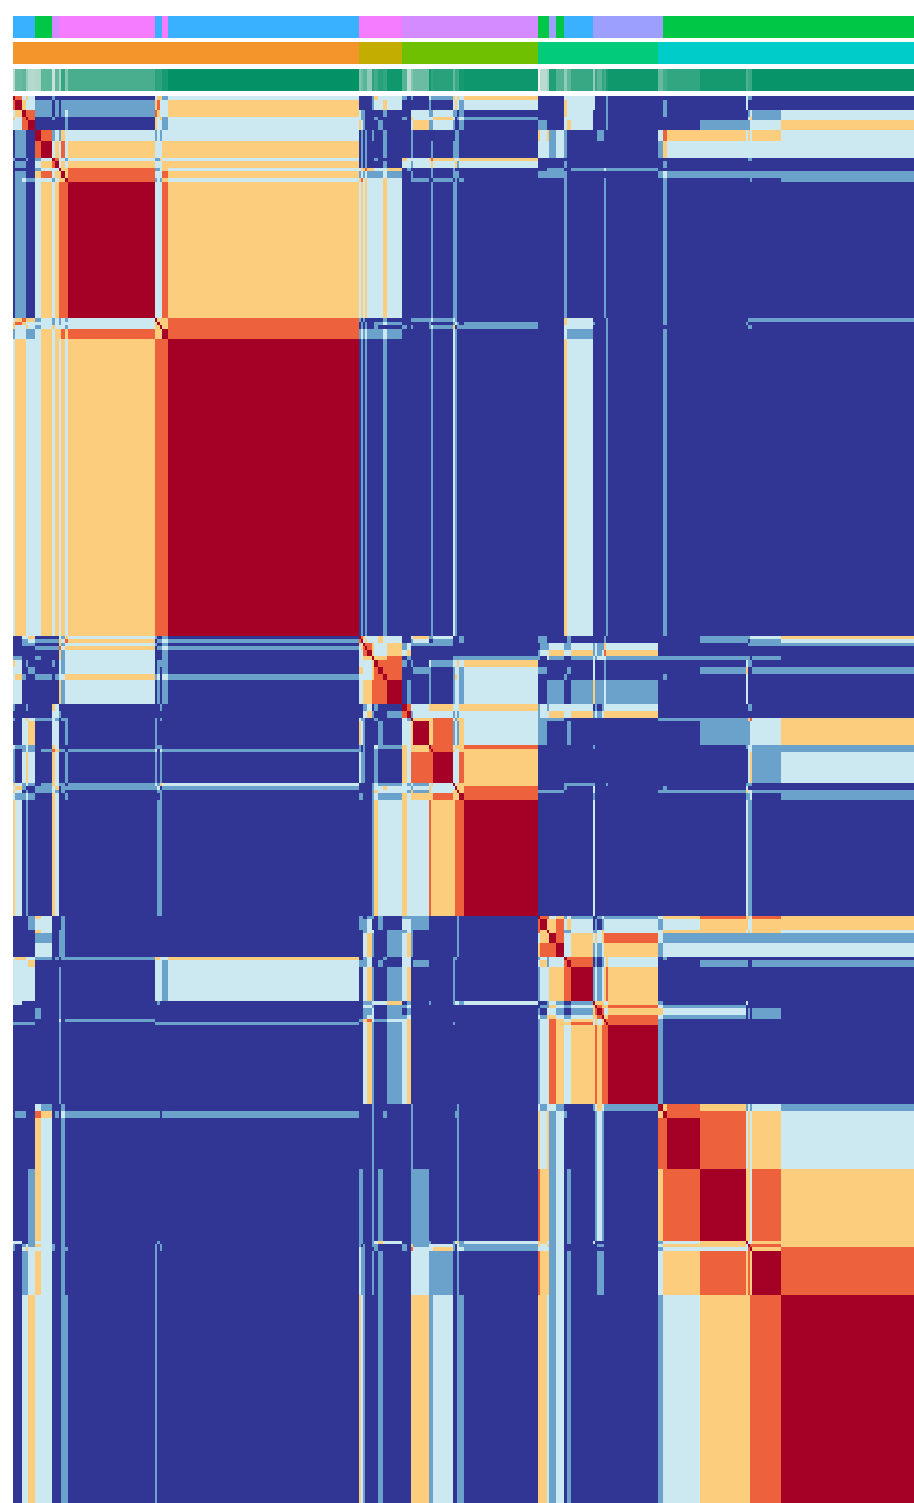

rank = 6

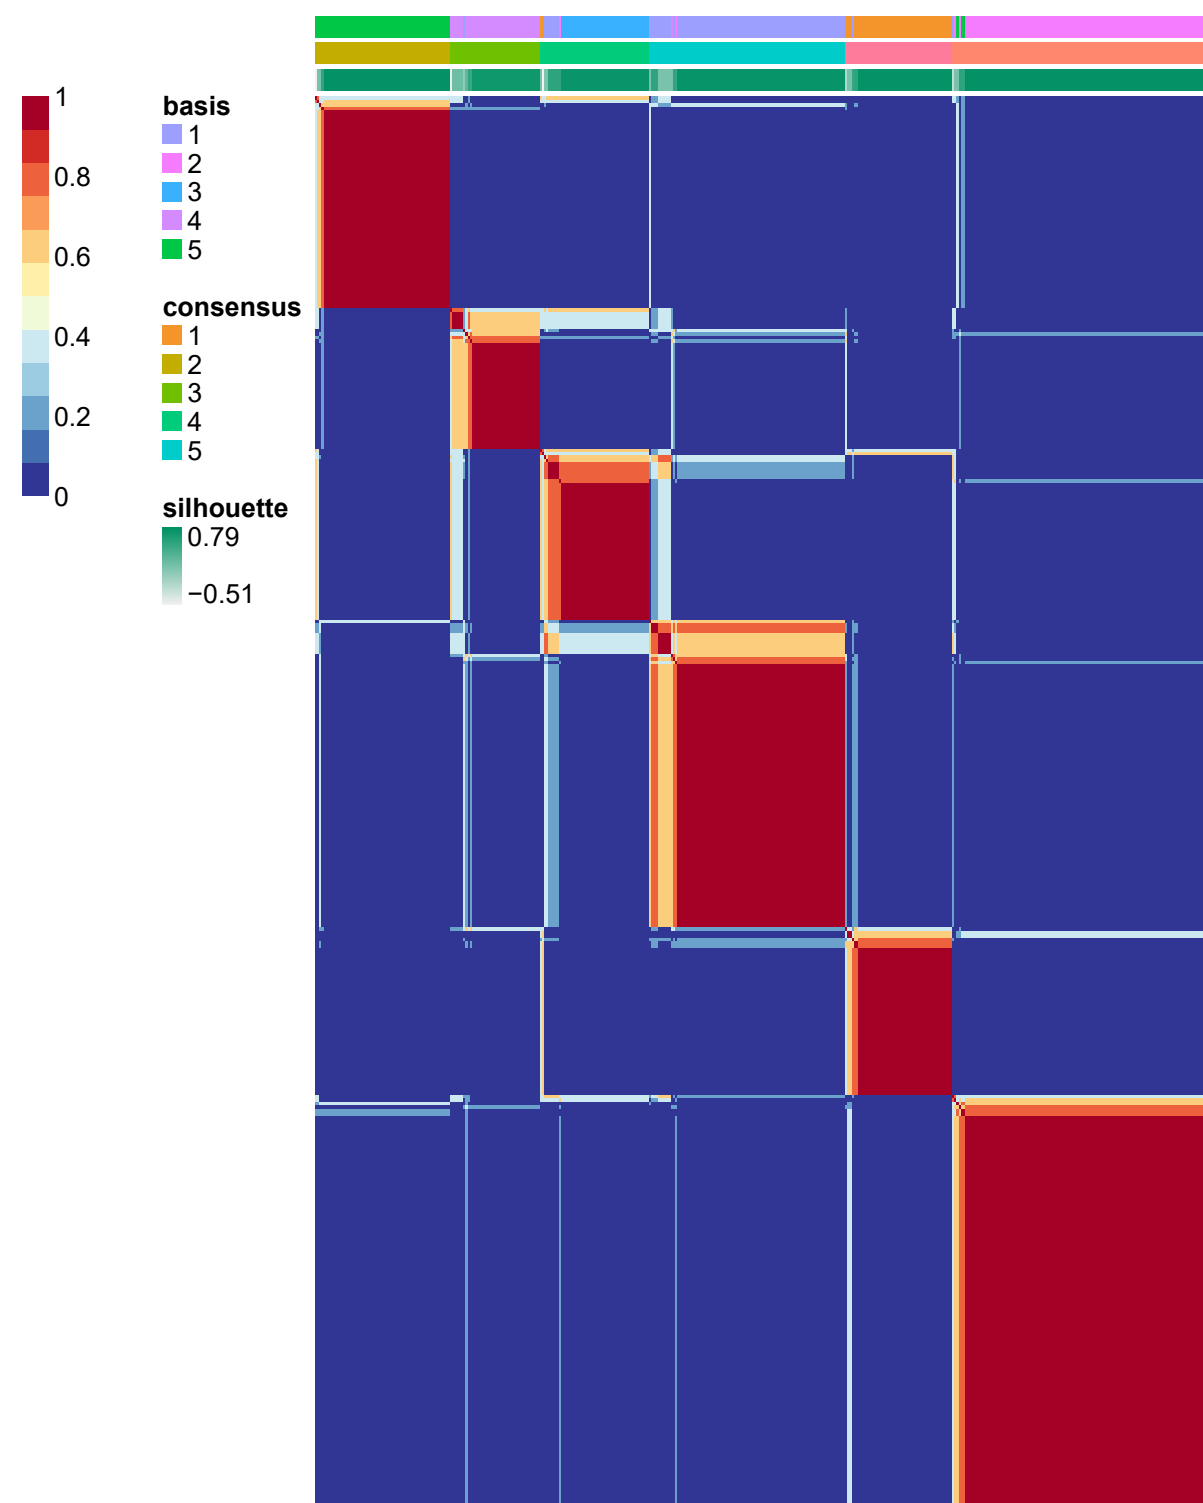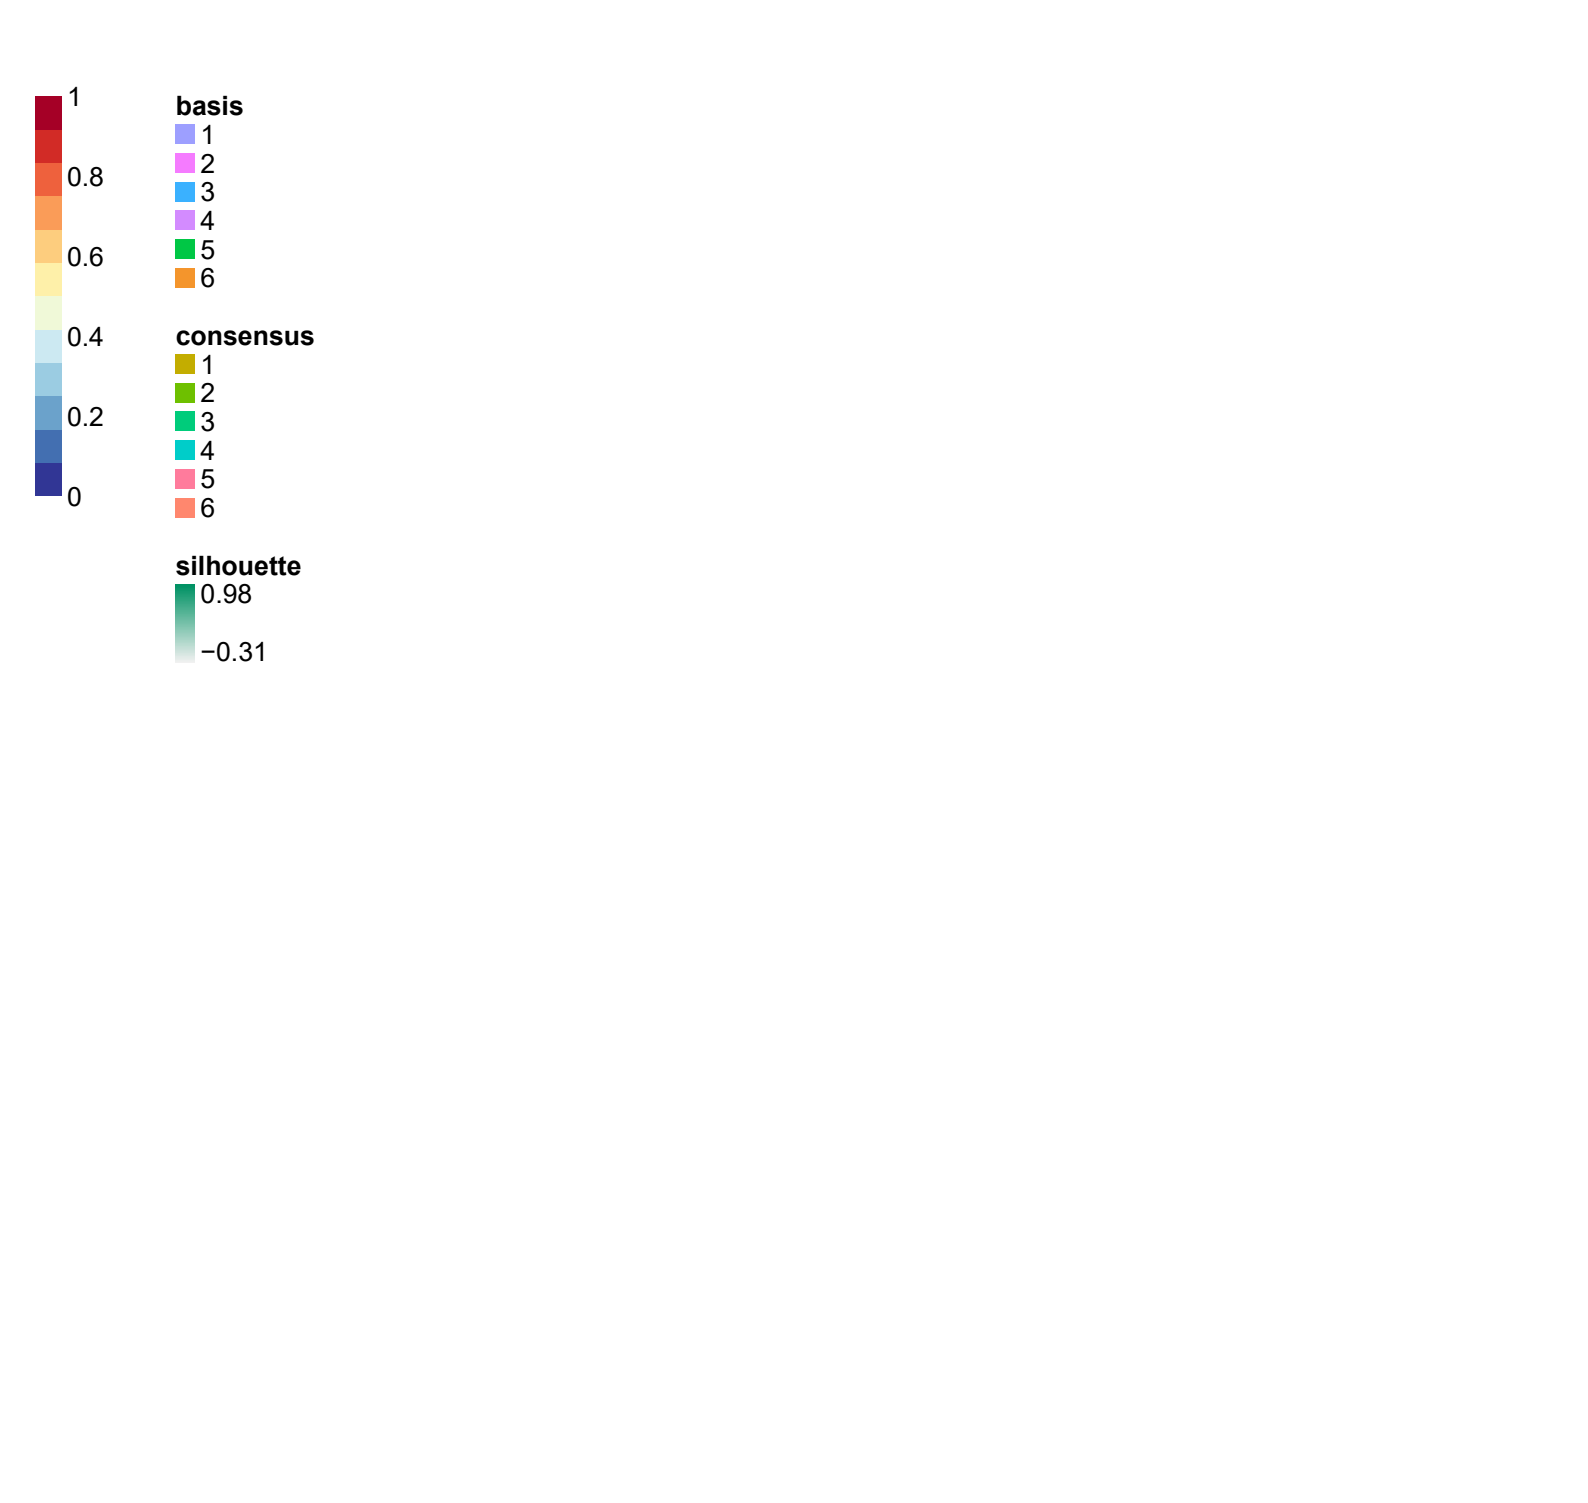

Supplement: 12967_2021_2865_MOESM1_ESM.pdf [file 12967_2021_2865_MOESM1_ESM.pdf]
